# Supplementary material for: Comprehensive Topographical Map of the Serotonergic Fibers in the Mouse Brain
Source: bioRxiv or medRxiv preprint supplement (doi:10.1101/2020.03.18.997775), 2020-03-20
Supplement: Supplementary file [file media-1.pdf]

1 **Comprehensive Topographical Map of the Serotonergic Fibers in the Mouse Brain**

2 **Janak R. Awasthi<sup>1,2</sup>, Kota Tamada<sup>1</sup>, Eric T. N. Overton<sup>1</sup>, Toru Takumi<sup>1,2,3\*</sup>**

3 <sup>1</sup>RIKEN Brain Science Institute, Wako, Saitama 351-0198, Japan

4 <sup>2</sup>Graduate School of Science and Engineering, Saitama University, Sakura, Saitama 338-8570,  
5 Japan

6 <sup>3</sup>Department of Physiology and Cell Biology, Kobe University School of Medicine, Chuo,  
7 Kobe 650-0017, Japan

8

9 **\*Correspondence to:**

10 Toru Takumi

11 RIKEN Center for Brain Science, 2-1 Hirosawa, Wako, Saitama 351-0198, Japan.

12 TEL: +81 48 467 5906, FAX: +81 48 467 6079

13 Email: toru.takumi@riken.jp

14

15 **Funding information**

16 This work was supported partly by KAKENHI (16H06316, 16H06463) from Japan Society for  
17 the Promotion of Science and Ministry of Education, Culture, Sports, Science, and Technology,  
18 Intramural Research Grant for Neurological and Psychiatric Disorders of NCNP, the Takeda  
19 Science Foundation and Smoking Research Foundation. Awasthi has been awarded the  
20 International Program Associate (IPA) fellowship from the RIKEN - Saitama University joint  
21 frontier program, Japan.

22

**23 Abstract**

24 It is well established that serotonergic fibers distribute throughout the brain. Abnormal  
25 densities or patterns of serotonergic fibers have been implicated in neuropsychiatric disorders.  
26 Although many classical studies have examined the distribution pattern of serotonergic fibers,  
27 most of them were either limited to specific brain areas or had limitations in demonstrating the  
28 fine axonal morphology. In this study, we utilize transgenic mice expressing GFP under the  
29 SERT promoter to map the topography of serotonergic fibers across the rostro-caudal extent of  
30 each brain area. We demonstrate previously unreported regional density and fine-grained  
31 anatomy of serotonergic fibers. Our findings include: 1) SERT fibers distribute abundantly in  
32 the thalamic nuclei close to the midline and dorsolateral areas, in most of the hypothalamic  
33 nuclei with few exceptions such as the median eminence and arcuate nuclei, and within the  
34 basal amygdaloid complex and lateral septal nuclei, 2) the source fibers of innervation of the  
35 hippocampus traverse through the septal nuclei before reaching its destination, 3) unique,  
36 filamentous type of straight terminal fibers within the nucleus accumbens, 4) laminar pattern  
37 of innervation in the hippocampus, olfactory bulb and cortex with heterogenicity in innervation  
38 density among the layers, 5) cortical labelling density gradually decreases rostro-caudally, 6)  
39 fibers traverse and distribute mostly within the gray matter, leaving the white fiber bundles  
40 uninnervated, and 7) most of the highly labelled nuclei and cortical areas have predominant  
41 anatomical connection to limbic structures. In conclusion, we provide novel, regionally specific  
42 insights on the distribution map of serotonergic fibers using transgenic mouse.

43 **Keywords:** Serotonin, SERT, transgenic mouse, whole brain mapping

**Supplementary figure 1: Representative images of the innervation density**

(A) Innervation density scale 0. olfactory nerve (arrow). (B) Innervation density scale 1. ventrobasal thalamic nuclei (circle) (C) Innervation density scale 2. Cortex (arrow) (D) Innervation density scale 3. Cortex (arrow) (E) Innervation density scale 4. CA3 stratum oriens of hippocampus (arrow) (F) Innervation density scale 5. Lateral dorsal thalamic nuclei (G) innervation density scale 6. Basal amygdaloid complex (arrow).

**Supplementary Figure 2. Schema of the findings in this study**

The main ascending forebrain bundle (blue line) arising from the midbrain raphe cell clusters (B5-B9) branched to give various collaterals (green lines) which ultimately innervate the whole brain, finally to terminate in the olfactory bulb. We analyzed the density and pattern of innervation rostro-caudally throughout the forebrain and cerebellum. Words or abbreviations with asterisks (\*) are the most labelled parts within the respective brain region or sub-regions. Specifically, glomerular (gl) layer within the olfactory bulb, globus pallidus (GP) within the basal ganglia, lateral septal nuclei rostral part (LSr) within the septum, suprachiasmatic nuclei (SCN) within the hypothalamus (HYP), basal amygdaloid complex within the amygdala (AMY), dorsolateral and midline

area within the thalamus (TH), stratum lacunosum moleculare (slm) within the hippocampus (HIP) and deep nuclei within the cerebellum were the most labelled parts.

Unique terminal fibers were found distributed within the nucleus accumbens (NAc). The innervation density of cortex (CTX) decreased rostro-caudally. The fibers were arranged in the laminar pattern within the olfactory bulb, hippocampus and cortex.

For Peer Review

Supplimentary figure 1

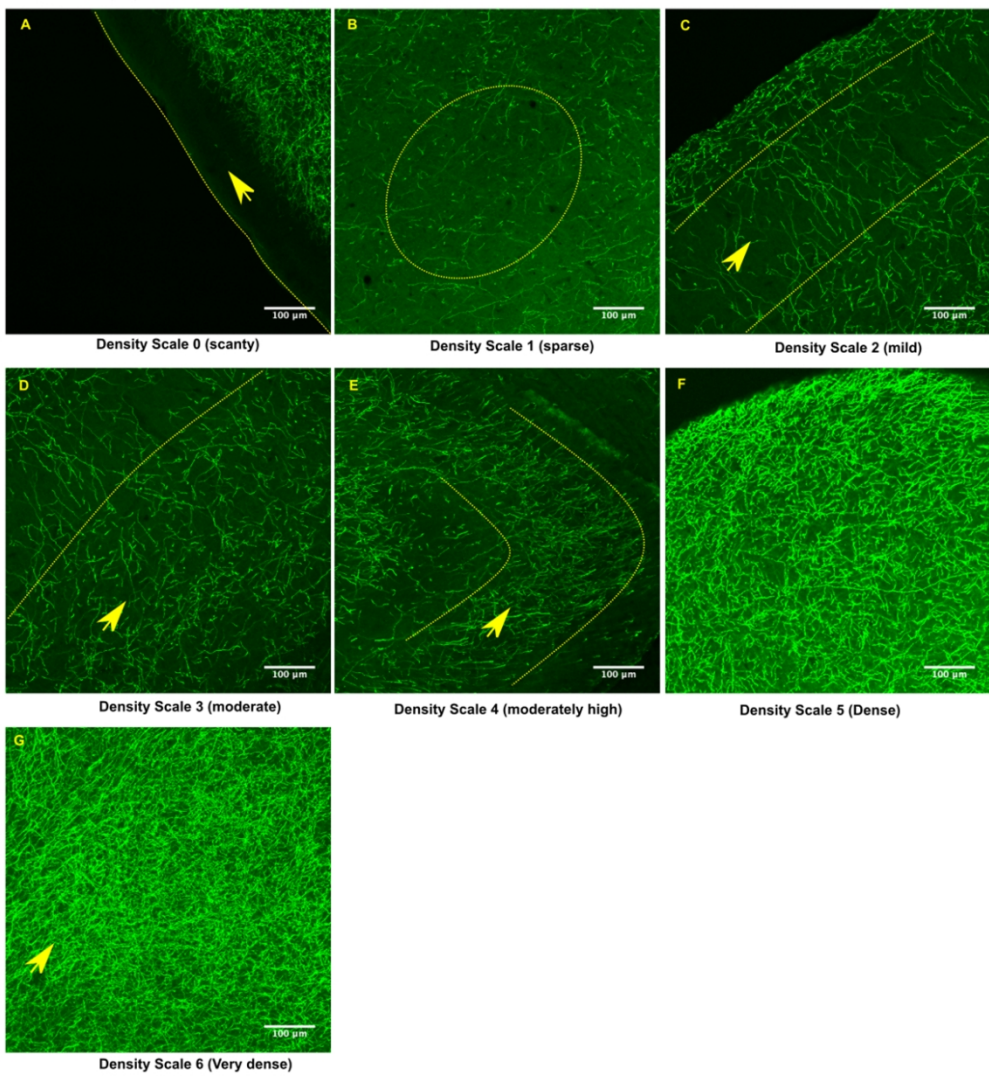

100x111mm (299 x 299 DPI)

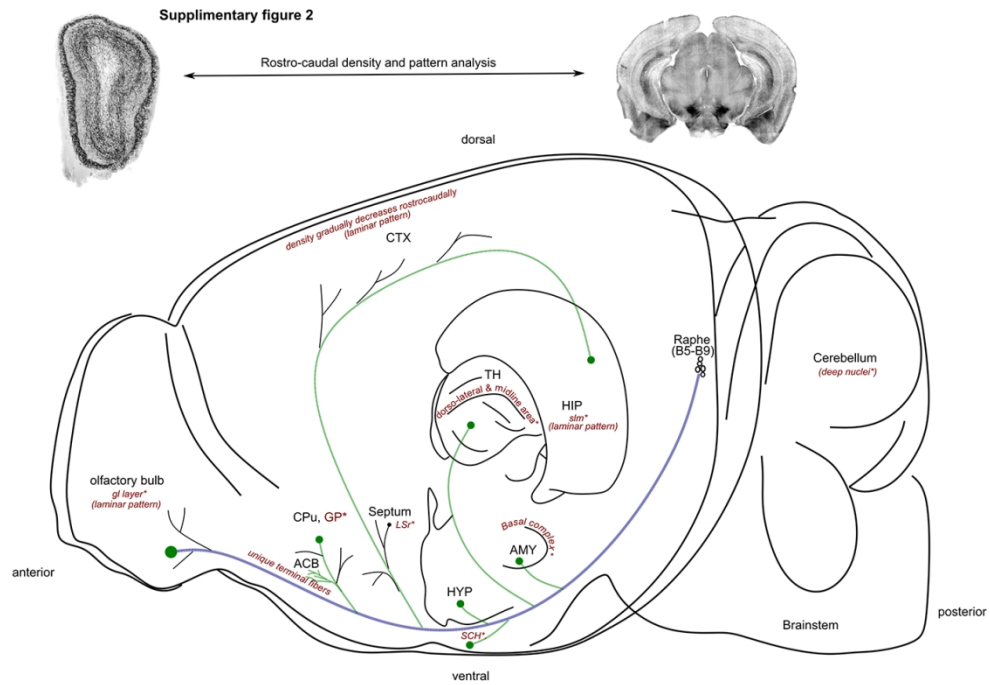

120x84mm (300 x 300 DPI)
